# Supplementary material for: Temperature- and pressure-dependent studies of niccolite-type formate frameworks of [NH3(CH2)4NH3][M2(HCOO)6] (M = Zn, Co, Fe)
Source: Royal Society of Chemistry journal article supplement (doi:10.1039/c6cp05834e), 2016-01-01
Supplement: c6cp05834e1.pdf [file c6cp05834e1.pdf]

Supporting information for

**Temperature- and pressure-dependent studies of niccolite-type  
formate frameworks of  $[\text{NH}_3(\text{CH}_2)_4\text{NH}_3][\text{M}_2(\text{HCOO})_6]$  (M=Zn, Co,  
Fe)**

*Mirosław Mączka,<sup>\*a</sup> Maciej Ptak,<sup>a</sup> Sebastian Pawlus,<sup>b</sup> Waldeci Paraguassu,<sup>c</sup> Adam Sieradzki,<sup>d</sup>  
Sergejus Balciunas,<sup>e</sup> Mantas Simenas,<sup>e</sup> and Juras Banys<sup>e</sup>*

*<sup>a</sup>Institute of Low Temperature and Structure Research, Polish Academy of Sciences, Box 1410,  
50-950 Wrocław 2, Poland*

*<sup>b</sup>Institute of Physics, University of Silesia, ul. Uniwersytecka 4, 40-007 Katowice, Poland*

*<sup>c</sup>Faculdade de Física, Universidade Federal do Pará, 66075-110, Belém, PA, Brazil*

*<sup>d</sup>Department of Experimental Physics, Wrocław University of Technology, Wybrzeże  
Wyspiańskiego 27, 50-370, Wrocław, Poland*

*<sup>e</sup>Faculty of Physics, Vilnius University, Sauletekio av. 9, LT-10222 Vilnius, Lithuania*

e-mail: m.maczka@int.pan.wroc.pl

Table S1. IR wavenumbers (in  $\text{cm}^{-1}$ ) of bnZn, bnCo and bnFe and proposed assignments.<sup>a</sup>

| bnZn            |                        | bnCo            |               | bnFe            |               | assignment                                          |
|-----------------|------------------------|-----------------|---------------|-----------------|---------------|-----------------------------------------------------|
| 294 K           | 5 K                    | 294 K           | 5 K           | 294 K           | 5 K           |                                                     |
| 3167sh          | 3197w, 3171vw          | 3196sh          | 3214sh, 3192w | 3173sh          | 3188w         | $\nu(\text{NH}_3)$                                  |
|                 | 3153w                  | 3166sh          |               |                 |               |                                                     |
|                 | 3125w, 3095m           |                 | 3130sh, 3103m |                 | 3130w, 3103m  | $\nu(\text{NH}_3)$                                  |
| 3050m           | 3056m, 3031w           | 3054m           | 3059w         | 3053m           | 3061m         | $\nu(\text{NH}_3)$                                  |
| 3031vw          | 3034vw                 |                 | 3033w, 3026w  |                 | 3032sh        | $\nu(\text{NH}_3)$                                  |
| 3004w           | 3003m                  | 3003w           | 3005m, 2991m  | 3003w           | 3001s, 2982sh | $\nu_{\text{as}}(\text{CH}_2)$                      |
| 2944m           | 2948sh, 2939m          | 2940m           | 2948m, 2939m  | 2941m           | 2946sh, 2929m | $\nu_{\text{as}}(\text{CH}_2)$                      |
|                 | 2930sh                 |                 | 2928m         |                 |               |                                                     |
| 2904w           | 2904w                  |                 | 2901w         | 2910w           | 2902w         | $\nu_{\text{s}}(\text{CH}_2)$                       |
| 2878w           | 2886w, 2868w           | 2872vw          | 2876m         | 2871sh          | 2870w         | $\nu_{\text{s}}(\text{CH}_2)$                       |
| 2845m           | 2855m, 2843m           | 2850m           | 2850m, 2838sh | 2843s           | 2843s         | $\nu_1(\text{HCOO}^-)$                              |
| 2803sh          | 2813m                  | 2804w           | 2814w         | 2804sh          | 2806w         | overtones                                           |
| 2790sh          | 2797m                  | 2790sh          | 2798w         | 2784sh          | 2796w         | overtones                                           |
| 2103w,b         | 2152w, 2135w           | 2102w,b         | 2142w         | 2098w           | 2130w         | $\delta_{\text{as}}(\text{NH}_3)+\tau(\text{NH}_3)$ |
|                 | 2122w                  |                 |               |                 |               |                                                     |
|                 | 1655vw                 | 1653vw          | 1654w         | 1649w           | 1653w         | $\delta_{\text{as}}(\text{NH}_3)$                   |
| 1637sh          | 1644sh, 1432w          | 1632sh,         | 1642w, 1434w  | 1632sh          | 1644w         | $\delta_{\text{as}}(\text{NH}_3)$                   |
| 1592s           | 1602s, 1584s           | 1592s           | 1597s, 1585s  | 1588s           | 1590s         | $\nu_4(\text{HCOO}^-)$                              |
| 1520w,b         | 1536w, 1527w           | 1521w           | 1529w, 1535w  | 1522w           | 1531w         | $\delta_{\text{s}}(\text{NH}_3)$                    |
| 1456w,<br>1449w | 1458m, 1455sh<br>1447w | 1456w,<br>1449w | 1457w, 1450w  | 1455w,<br>1450w | 1456w, 1449w  | $\delta(\text{CH}_2)$                               |

|                 |                           |                |                                          |                 |                       |                                   |
|-----------------|---------------------------|----------------|------------------------------------------|-----------------|-----------------------|-----------------------------------|
| 1373s           | 1381s, 1374s              | 1372s          | 1382sh, 1377s<br>1373s                   | 1373s           | 1374s                 | $\nu_5(\text{HCOO}^-)$            |
| 1356sh<br>1345s | 1360w, 1352s<br>1343s     | 1356s<br>1348s | 1362sh, 1359s<br>1354s, 1351sh,<br>1345s | 1356sh<br>1347s | 1357s, 1352s<br>1346s | $\nu_2(\text{HCOO}^-)$            |
| 1316w           | 1318w, 1315w              |                | 1320vw                                   |                 | 1319w                 | $\omega(\text{CH}_2)$             |
| 1304sh          | 1302w                     | 1294vw         | 1292w                                    | 1295vw          | 1293w                 | $\omega(\text{CH}_2)$             |
| 1270w           | 1270w                     | 1270w          | 1271w                                    | 1269w           | 1270w                 | $\tau(\text{CH}_2)$               |
| 1262w           | 1260vw                    | 1263w          | 1263w                                    | 1262w           | 1263w                 | $\tau(\text{CH}_2)$               |
| 1189vw          | 1193w                     | 1189vw         | 1193vw                                   | 1184vw          | 1191w                 | $\tau(\text{CH}_2)$               |
| 1170w           | 1174w                     | 1172w          | 1174w                                    | 1171w           | 1174w                 | $\rho(\text{NH}_3)$               |
| 1110w           | 1112w                     | 1111w          | 1113w, 1111sh                            | 1111vw          | 1128w, 1113w          | $\rho(\text{NH}_3)$               |
| 1099w           | 1101w                     | 1098w          | 1100w                                    | 1101w           | 1101w                 | $\rho(\text{NH}_3)$               |
| 1077w           | 1088w                     |                | 1088w                                    |                 | 1088vw,<br>1081vw     | $\nu(\text{CC})$                  |
| 1070w           | 1080w, 1077w              | 1070w          | 1069w                                    | 1072w           |                       | $\nu_6(\text{HCOO}^-)$            |
| 1056w           | 1062w                     | 1056w          |                                          | 1056w           | 1060w                 | $\nu(\text{CC})$                  |
| 1032w           | 1039w, 1035w              | 1033w          | 1037w, 1034w                             | 1031w           | 1035w                 | $\nu(\text{CC})$                  |
| 1024w           | 1027w, 1024w              | 1024w          | 1027w, 1024w                             | 1023w           | 1027w                 | $\nu(\text{CC})$                  |
| 1000w           | 1007vw, 1003w             | 1001w          | 1004w                                    | 1001w           | 1004w                 | $\nu(\text{CC}) + \nu(\text{CN})$ |
| 984w            | 992w, 988w                | 984w           | 991w                                     | 982w            | 991w                  | $\nu(\text{CC}) + \nu(\text{CN})$ |
| 917vw           | 923vw, 919w               | 917vw          | 920w                                     | 917vw           | 920w                  | $\nu(\text{CN})$                  |
| 910w            | 912w                      | 910vw          |                                          | 908w            | 913w                  | overtone                          |
| 889w            | 894w, 885w                | 888w           | 894w, 887sh                              | 886w            | 892w, 887sh           | $\rho(\text{NH}_3)$               |
| 872vw           | 873w                      | 872w           | 874w                                     | 872vw           | 873w                  | $\nu(\text{CN})$                  |
| 844vw           | 847w                      | 844vw          | 846w                                     | 843vw           | 846w                  | overtone                          |
| 799s            | 817w, 809w<br>802s, 795sh | 803s           | 816sh, 811sh<br>805s                     | 813sh,<br>798s  | 819sh, 814sh<br>801s  | $\nu_3(\text{HCOO}^-)$            |
| 750vw           | 752w                      | 752vw          | 752w                                     | 751vw           | 752w                  | $\rho(\text{CH}_2)$               |

|         |                |         |              |       |             |                                                              |
|---------|----------------|---------|--------------|-------|-------------|--------------------------------------------------------------|
| 742w    | 745w           | 743w    | 745w         | 741w  | 744w        | $\rho(\text{CH}_2)$                                          |
| 524w    | 527w           | 524w    | 527w         | 522w  | 527w        | $\delta(\text{CCC})$                                         |
| 495w    | 502w, 497w     | 496vw   | 496vw        | 496w  | 497w        | $\delta(\text{CCC})$                                         |
| ~493w,b | 518w, 515w     | ~490w,b | 516sh, 511w  |       | ~503w,b     | $\tau(\text{NH}_3)$                                          |
| 450w    | 452w           | 450w    | 452w         | 448w  | 451w        | $\delta(\text{CCN})$                                         |
| 422w    | 428m           | 423w    | 427m, 424sh  | 420w  | 435sh, 425w | $\delta(\text{CCN})$                                         |
|         |                |         | 369sh        | 368m  | 376m        | $\text{T}'(\text{HCOO}^-) + \text{T}'(\text{M}^{2+})$        |
| 304m    | 320m           | 321s    | 341s         | 313s  | 329s        | $\text{T}'(\text{HCOO}^-) + \text{T}'(\text{M}^{2+})$        |
|         | 295w, 285w     |         | 322sh, 311w  |       | 304w, 285w  | $\text{T}'(\text{HCOO}^-) + \text{T}'(\text{M}^{2+})$        |
| 246m    | 262m, 256m     | 268m    | 286w, 278m   | 259m  | 268m        | $\text{T}'(\text{HCOO}^-) + \text{T}'(\text{M}^{2+})$        |
|         | 250w, 242m     |         | 261w         |       |             |                                                              |
| 204s    | 230vw, 212m    | 221sh   | 234w,        |       |             | $\text{T}'(\text{HCOO}^-) + \text{L}(\text{HCOO}^-)$         |
|         | 204m           |         |              |       |             |                                                              |
| 177s    | 192m, 182s     | 202s    | 215sh, 210w, | 193s  | 201s, 189s  | $\text{T}'(\text{HCOO}^-) + \text{L}(\text{HCOO}^-)$         |
|         | 177s           |         | 205sh, 193sh |       |             |                                                              |
|         | 159vw, 152vw   | 160vw,b | 177vw, 170vw |       | 157w, 148w  | $\text{L}(\text{bnH}_2^{2+}) + \text{T}'(\text{bnH}_2^{2+})$ |
|         | 148vw, 140vw   |         | 160w, 155w   |       |             |                                                              |
|         | 132vw, 126vw   |         | 138vw        |       |             |                                                              |
| 100vw   | 105w, 99w, 88w | 106w    | 109m, 101vw  | 100vw | 101w        | $\text{L}(\text{bnH}_2^{2+}) + \text{T}'(\text{bnH}_2^{2+})$ |
|         |                |         | 92w          |       |             |                                                              |

<sup>a</sup>Key: s, strong; m, medium; w, weak; vw, very weak; sh, shoulder; b, broad; Internal vibrations of  $\text{HCOO}^-$  ions are classified as C-H stretching ( $\nu_1$ ), symmetric C-O stretching ( $\nu_2$ ), antisymmetric C-O stretching ( $\nu_4$ ), symmetric O-C-O bending ( $\nu_3$ ), C-H in-plane bending ( $\nu_5$ ) and C-H out-of-plane bending ( $\nu_6$ ) modes. Internal vibrations of  $\text{bnH}_2^{2+}$  cation are subdivided into symmetric stretching ( $\nu_s(\text{CH}_2)$ ), antisymmetric stretching ( $\nu_{as}(\text{CH}_2)$ ), scissoring ( $\delta(\text{CH}_2)$ ), rocking ( $\rho(\text{CH}_2)$ ), wagging ( $\omega(\text{CH}_2)$ ) and torsion or twisting ( $\tau(\text{CH}_2)$ ) modes of the  $\text{CH}_2$  groups as well as symmetric stretching ( $\nu_s$ ), antisymmetric stretching ( $\nu_{as}$ ), bending ( $\delta$ ), rocking ( $\rho$ ) and torsion ( $\tau$ ) modes of the  $\text{NH}_3$  groups. The remaining vibrations correspond to CC and CN stretching as well as CCN in-plane bending and out-of-plane bending modes.

Table S2. Raman wavenumbers (in  $\text{cm}^{-1}$ ) of bnZn, bnCo and bnFe and proposed assignments.<sup>a</sup>

| bnZn            |                               | bnCo          |               | bnFe         | assignment                        |
|-----------------|-------------------------------|---------------|---------------|--------------|-----------------------------------|
| 294 K           | 80 K                          | 294 K         | 80 K          | 294 K        |                                   |
| 3011m           | 3012m                         | 3009m         | 3010m         | 3007m        | $\nu_{\text{as}}(\text{CH}_2)$    |
| 2972s           | 2977sh, 2971s                 | 2971s         | 2976sh, 2971s | 2972s        | $\nu_{\text{as}}(\text{CH}_2)$    |
| 2942s           | 2949s, 2942s                  | 2953sh, 2944s | 2949s, 2941s  | 2940s        | $\nu_{\text{as}}(\text{CH}_2)$    |
| 2896w           | 2906w, 2901w<br>2892w         | 2897w         | 2906sh, 2900w | 2894w        | $\nu_{\text{s}}(\text{CH}_2)$     |
| 2870sh          | 2874m                         | 2871sh        | 2876m         | 2871sh       | $\nu_{\text{s}}(\text{CH}_2)$     |
| 2854s           | 2855s, 2850s                  | 2854s         | 2856s, 2852s  | 2850s        | $\nu_1(\text{HCOO}^-)$            |
| 1645vw          | 1655vw                        |               | 1650w         |              | $\delta_{\text{as}}(\text{NH}_3)$ |
| 1632vw          | 1641vw                        | 1634w         | 1642w         | 1637w        | $\delta_{\text{as}}(\text{NH}_3)$ |
|                 |                               | 1563w         | 1570w         | 1576w        | $\nu_4(\text{HCOO}^-)$            |
| 1456w,<br>1440w | 1458w, 1444w                  | 1458vw, 1441w | 1459w, 1445w  | 1458w, 1440w | $\delta(\text{CH}_2)$             |
| 1398sh          | 1400vw                        | 1399vw        | 1400w         |              | overtone                          |
| 1374s           | 1375s, 1369sh                 | 1371s         | 1372s, 1363w  | 1374s        | $\nu_5(\text{HCOO}^-)$            |
| 1354m           | 1362m, 1357sh<br>1352m, 1346w | 1353m         | 1352m, 1346w  | 1360m        | $\nu_2(\text{HCOO}^-)$            |
| 1325w           | 1323w                         | 1325w         | 1323w         | 1326w        | $\omega(\text{CH}_2)$             |
| 1292w           | 1291w                         | 1293vw        | 1292vw        | 1293w        | $\omega(\text{CH}_2)$             |
| 1085w           | 1087w                         | 1085vw        | 1088w         | 1087vw       | $\nu(\text{CC})$                  |
| 1070w           | 1074w, 1067w                  | 1069w         | 1072w         | 1068w        | $\nu_6(\text{HCOO}^-)$            |
| 1050w           | 1058w                         | 1057vw        | 1059w         |              | $\nu(\text{CC})$                  |
| 1032w           | 1037w                         | 1032w         | 1037w         | 1030w        | $\nu(\text{CC})$                  |
| 1000w           | 1004w                         | 1001vw        |               | 1000w        | $\nu(\text{CC}) + \nu(\text{CN})$ |
| 916w            | 923w                          | 919w          | 922w          | 940w, 916w   | $\nu(\text{CN})$                  |

|            |                    |              |                       |            |                                                                                                                              |
|------------|--------------------|--------------|-----------------------|------------|------------------------------------------------------------------------------------------------------------------------------|
| 887vw      | 892w               | 889vw        | 893w                  | 887vw      | $\rho(\text{NH}_3)$                                                                                                          |
| 874w       | 874w               | 874w         | 875vw                 | 875w       | $\nu(\text{CN})$                                                                                                             |
| 843vw      | 845w               |              |                       | 854w       | overtone                                                                                                                     |
| 811m, 798m | 815m, 801w         | 804sh, 798m  | 811m, 801m            | 810w, 800s | $\nu_3(\text{HCOO}^-)$                                                                                                       |
| 790sh      | 793w               | 793sh        | 796sh                 |            |                                                                                                                              |
| 751vw      | 751w               |              |                       | 751w       | $\rho(\text{CH}_2)$                                                                                                          |
| 522w       | 526w               |              |                       | 522w       | $\delta(\text{CCC})$                                                                                                         |
| 513w       | 511w               |              |                       | 512w       | $\delta(\text{CCC})$                                                                                                         |
| 312vw      | 318w               |              | 303w                  | 312w       | $\text{T}'(\text{HCOO}^-) + \text{T}'(\text{M}^{2+})$                                                                        |
| 260vw      | 281w, 274w         | 266sh        | 283w                  |            | $\text{T}'(\text{HCOO}^-) + \text{T}'(\text{M}^{2+})$                                                                        |
| 210sh      | 236w, 221w         | 242m         | 255m, 240m            |            | $\text{T}'(\text{HCOO}^-) + \text{T}'(\text{M}^{2+})$                                                                        |
| 189m       | 203m, 192m<br>181m | 198m         | 214m, 199m            | 189s       | $\text{L}(\text{HCOO}^-)$                                                                                                    |
| 144m       | 165w, 147m         | 152m<br>115m | 178m, 151m<br>126m    | 143sh      | $\text{L}(\text{HCOO}^-)$                                                                                                    |
| 108w       | 122w, 102m         | 92m          | 103w, 98m<br>75w, 68w |            | $\text{L}(\text{bnH}_2^{2+}) + \text{T}'(\text{bnH}_2^{2+})$<br>$\text{L}(\text{bnH}_2^{2+}) + \text{T}'(\text{bnH}_2^{2+})$ |

<sup>a</sup>Key: s, strong; m, medium; w, weak; vw, very weak; sh, shoulder; b, broad.

Table S3. The correlation diagram showing the correspondence between the optical modes of HCOO<sup>-</sup> in the  $P\bar{3}1c$  and  $R\bar{3}c$  structures of bnZn or bnCo as well as the  $P\bar{3}1c$  and  $Cc$  structures of bnMn (the data for the low-temperature structures are given in parentheses). Raman- and IR-active modes are denoted by blue and red color and the modes active both in Raman and IR spectra are denoted by green color.

| <b>bnZn and bnCo</b> |                                                   |                                                  |                                      |                                                                                                                                                                                                                               |
|----------------------|---------------------------------------------------|--------------------------------------------------|--------------------------------------|-------------------------------------------------------------------------------------------------------------------------------------------------------------------------------------------------------------------------------|
| ion                  | vibration                                         | Free ion symmetry                                | Site symmetry                        | Factor group symmetry                                                                                                                                                                                                         |
| HCOO <sup>-</sup>    |                                                   | <b>C<sub>2v</sub></b>                            | <b>C<sub>1</sub> (C<sub>1</sub>)</b> | <b>D<sub>3d</sub> (D<sub>3d</sub>)</b>                                                                                                                                                                                        |
|                      | v <sub>1</sub> , v <sub>2</sub> or v <sub>3</sub> | A <sub>1</sub>                                   | A (12A)                              | A <sub>1g</sub> +A <sub>2g</sub> +2E <sub>g</sub> +A <sub>1u</sub> +A <sub>2u</sub> +2E <sub>u</sub><br>(12A <sub>1g</sub> +12A <sub>2g</sub> +24E <sub>g</sub> +12A <sub>1u</sub> +12A <sub>2u</sub> +24E <sub>u</sub> )     |
|                      | v <sub>4</sub> , v <sub>5</sub> or v <sub>6</sub> | B <sub>1</sub>                                   | A (12A)                              | A <sub>1g</sub> +A <sub>2g</sub> +2E <sub>g</sub> +A <sub>1u</sub> +A <sub>2u</sub> +2E <sub>u</sub><br>(12A <sub>1g</sub> +12A <sub>2g</sub> +24E <sub>g</sub> +12A <sub>1u</sub> +12A <sub>2u</sub> +24E <sub>u</sub> )     |
|                      | T'                                                | A <sub>1</sub> + B <sub>1</sub> + B <sub>2</sub> | 3A (36A)                             | 3A <sub>1g</sub> +3A <sub>2g</sub> +6E <sub>g</sub> +3A <sub>1u</sub> +3A <sub>2u</sub> +6E <sub>u</sub><br>(36A <sub>1g</sub> +36A <sub>2g</sub> +72E <sub>g</sub> +36A <sub>1u</sub> +36A <sub>2u</sub> +72E <sub>u</sub> ) |
|                      | L                                                 | A <sub>2</sub> + B <sub>1</sub> + B <sub>2</sub> | 3A (36A)                             | 3A <sub>1g</sub> +3A <sub>2g</sub> +6E <sub>g</sub> +3A <sub>1u</sub> +3A <sub>2u</sub> +6E <sub>u</sub><br>(36A <sub>1g</sub> +36A <sub>2g</sub> +72E <sub>g</sub> +36A <sub>1u</sub> +36A <sub>2u</sub> +72E <sub>u</sub> ) |
| <b>bnMn</b>          |                                                   |                                                  |                                      |                                                                                                                                                                                                                               |
| ion                  | vibration                                         | Free ion symmetry                                | Site symmetry                        | Factor group symmetry                                                                                                                                                                                                         |
| HCOO <sup>-</sup>    |                                                   | <b>C<sub>2v</sub></b>                            | <b>C<sub>1</sub> (C<sub>1</sub>)</b> | <b>D<sub>3d</sub> (C<sub>s</sub>)</b>                                                                                                                                                                                         |
|                      | v <sub>1</sub> , v <sub>2</sub> or v <sub>3</sub> | A <sub>1</sub>                                   | A (6A)                               | A <sub>1g</sub> +A <sub>2g</sub> +2E <sub>g</sub> +A <sub>1u</sub> +A <sub>2u</sub> +2E <sub>u</sub> (6A'+6A'')                                                                                                               |
|                      | v <sub>4</sub> , v <sub>5</sub> or v <sub>6</sub> | B <sub>1</sub>                                   | A (6A)                               | A <sub>1g</sub> +A <sub>2g</sub> +2E <sub>g</sub> +A <sub>1u</sub> +A <sub>2u</sub> +2E <sub>u</sub> (6A'+6A'')                                                                                                               |
|                      | T'                                                | A <sub>1</sub> + B <sub>1</sub> + B <sub>2</sub> | 3A (18A)                             | 3A <sub>1g</sub> +3A <sub>2g</sub> +6E <sub>g</sub> +3A <sub>1u</sub> +3A <sub>2u</sub> +6E <sub>u</sub><br>(18A'+18A'')                                                                                                      |
|                      | L                                                 | A <sub>2</sub> + B <sub>1</sub> + B <sub>2</sub> | 3A (18A)                             | 3A <sub>1g</sub> +3A <sub>2g</sub> +6E <sub>g</sub> +3A <sub>1u</sub> +3A <sub>2u</sub> +6E <sub>u</sub><br>(18A'+18A'')                                                                                                      |

Table S4. Wavenumber intercepts at zero pressure ( $\omega_0$ ) and pressure coefficients ( $\alpha=d\omega/dP$ ), obtained from fitting of the experimental data by linear functions, for the ambient and high-pressure phases of bnZn.

| ambient pressure phase             |                                                 | high-pressure phase                |                                                 | assignment                                         |
|------------------------------------|-------------------------------------------------|------------------------------------|-------------------------------------------------|----------------------------------------------------|
| $\omega_0$<br>( $\text{cm}^{-1}$ ) | $\alpha$<br>( $\text{cm}^{-1}\text{GPa}^{-1}$ ) | $\omega_0$<br>( $\text{cm}^{-1}$ ) | $\alpha$<br>( $\text{cm}^{-1}\text{GPa}^{-1}$ ) |                                                    |
| 1086.7                             | 2.85                                            |                                    |                                                 | $\nu(\text{CC})$                                   |
| 1071.2                             | 2.66                                            | 1066.3                             | 5.72                                            | $\nu_6(\text{HCOO}^-)$                             |
| 1035.8                             | 2.98                                            |                                    |                                                 | $\nu(\text{CC})$                                   |
| 1002.1                             | 2.61                                            | 1007.2                             | 2.28                                            | $\nu(\text{CC}) + \nu(\text{CN})$                  |
| 917.4                              | 1.02                                            | 901.2                              | 5.34                                            | $\nu(\text{CN})$                                   |
| 891.7                              | 3.58                                            |                                    |                                                 | $\rho(\text{NH}_3)$                                |
| 874.5                              | 4.09                                            | 875.8                              | 3.69                                            | $\nu(\text{CN})$                                   |
| 811.9                              | 3.98                                            | 800.8                              | 4.00                                            | $\nu_3(\text{HCOO}^-)$                             |
| 799.5                              | 2.74                                            | 812.3                              | -0.35                                           | $\nu_3(\text{HCOO}^-)$                             |
| 789.3                              | 2.55                                            | 797.6                              | 0.98                                            | $\nu_3(\text{HCOO}^-)$                             |
| 523.2                              | 3.16                                            |                                    |                                                 | $\delta(\text{CCC})$                               |
| 514.3                              | 2.95                                            | 513.9                              | 2.99                                            | $\delta(\text{CCC})$                               |
|                                    |                                                 | 273.1                              | 11.13                                           | $\Gamma'(\text{HCOO}^-) + \Gamma'(\text{Zn}^{2+})$ |
|                                    |                                                 | 221.0                              | 12.85                                           | $\Gamma'(\text{HCOO}^-) + \Gamma'(\text{Zn}^{2+})$ |
| 206.0                              | 5.27                                            | 218.7                              | 5.98                                            | $\Gamma'(\text{HCOO}^-) + \Gamma'(\text{Zn}^{2+})$ |
| 189.9                              | 4.74                                            | 199.4                              | 5.46                                            | $L(\text{HCOO}^-)$                                 |
|                                    |                                                 | 197.9                              | 1.79                                            | $L(\text{HCOO}^-)$                                 |
|                                    |                                                 | 166.0                              | 3.81                                            | $L(\text{HCOO}^-)$                                 |
| 144.2                              | 2.61                                            | 156.9                              | 3.37                                            | $L(\text{HCOO}^-)$                                 |



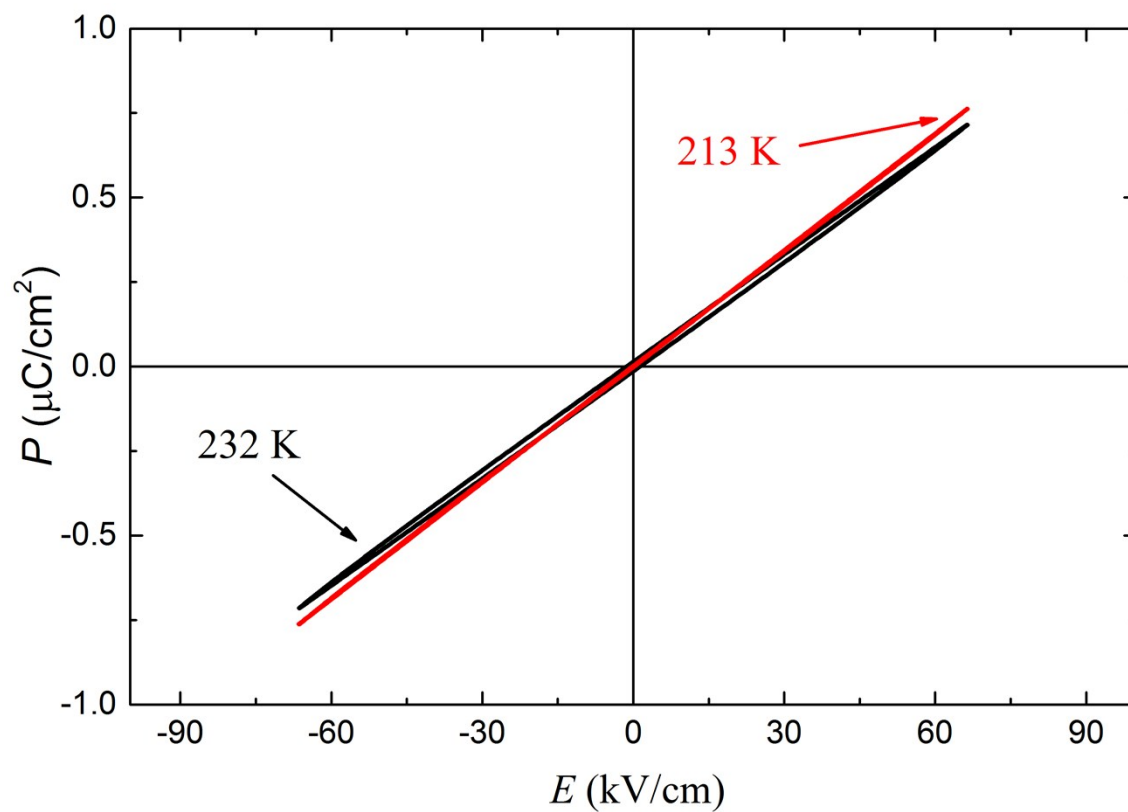

Figure S1. Electric field dependence of the electric polarization of bnZn measured at 232 K and 213 K. Measurement performed along the  $c$ -crystal axis.

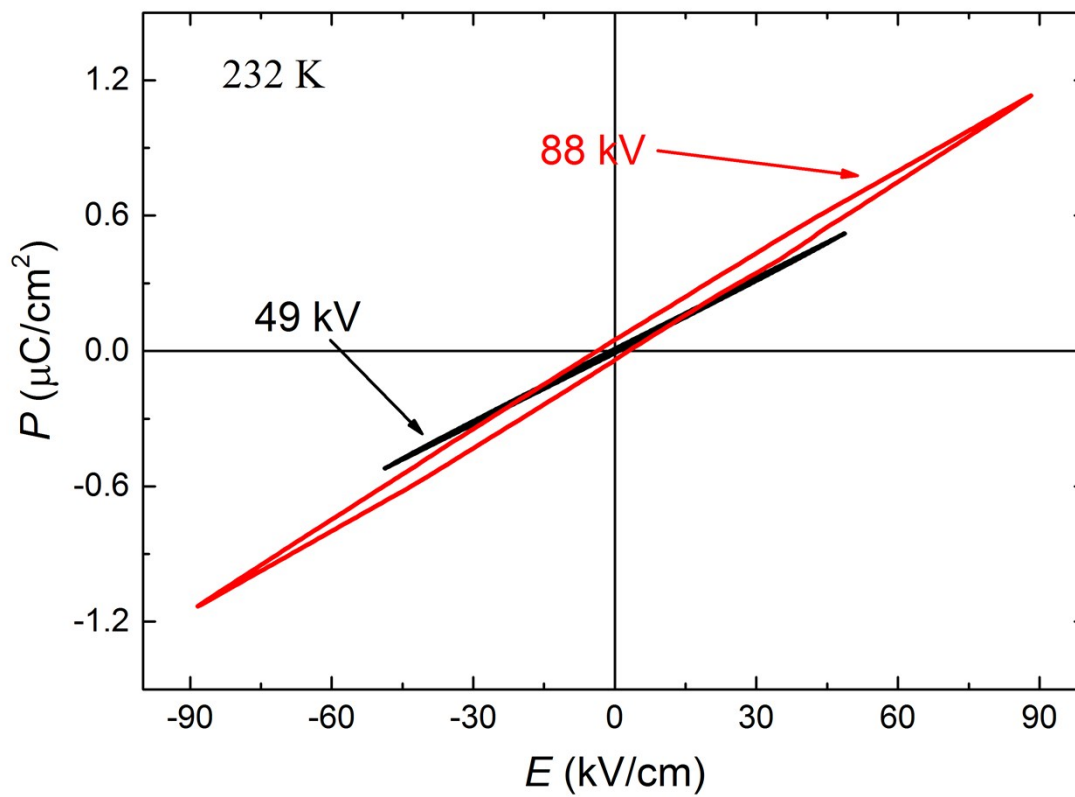

Figure S2. Electric field dependence of the electric polarization of  $\text{bnZn}$  obtained at  $232\text{ K}$  for two different measuring voltages. Measurement performed along the  $c$ -crystal axis.

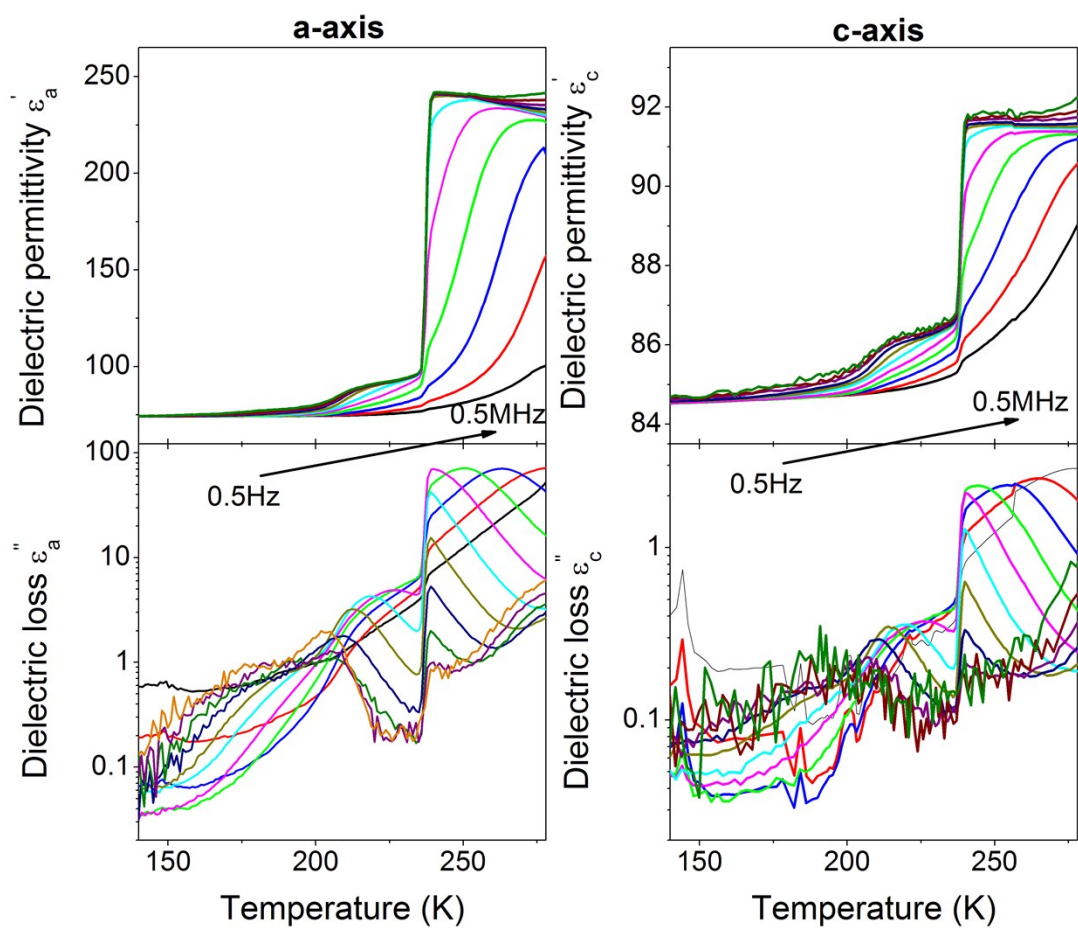

Figure S3. The temperature-dependent traces of the complex dielectric permittivity for two different crystallographic orientations along the *a*- and *c*-axis.

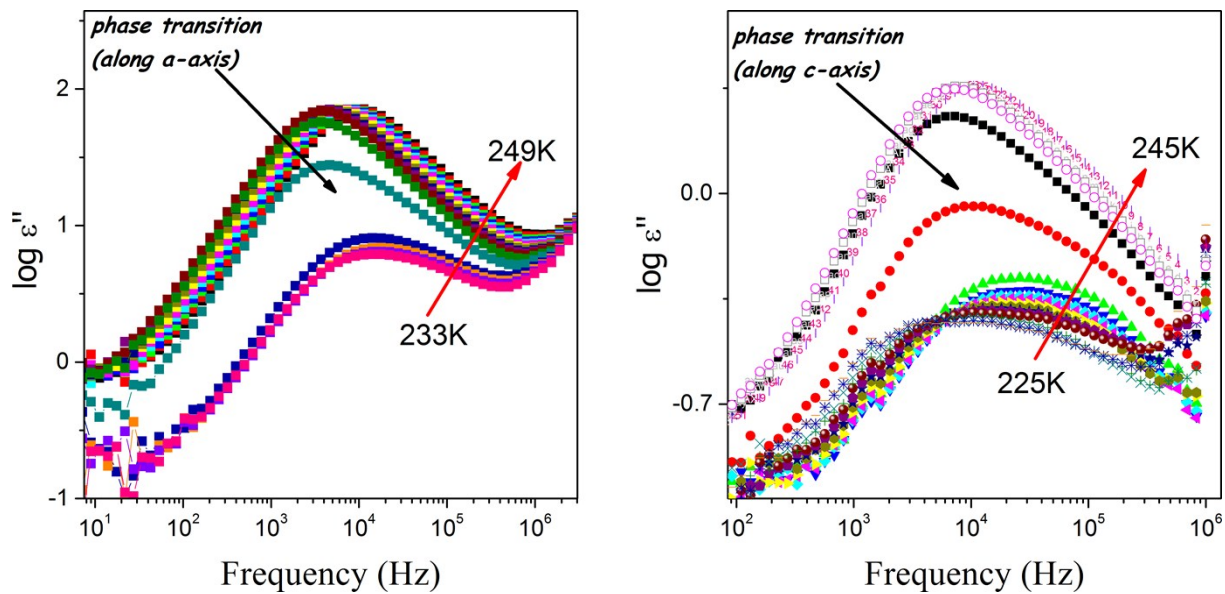

Figure S4. Frequency dependence of the complex dielectric permittivity for the investigated sample in two crystallographic directions.

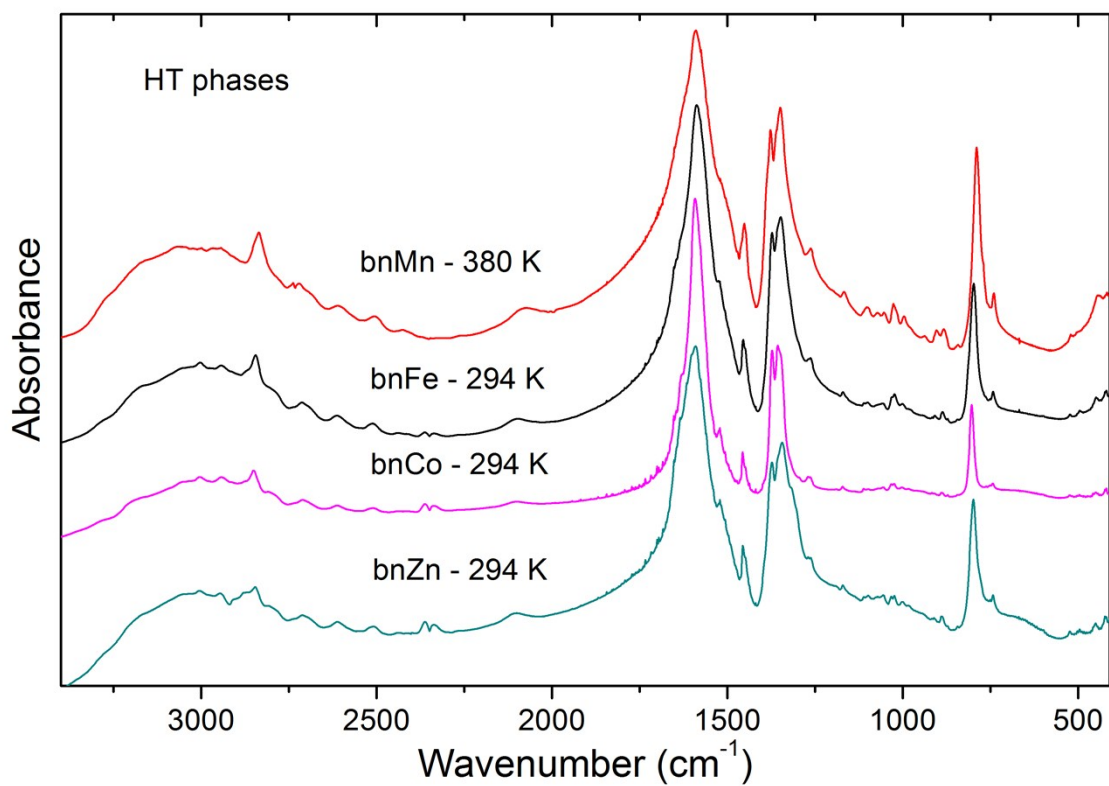

Figure S5. Room-temperature mid-IR spectra of the studied compounds. IR spectrum of the HT phase of bnMn is also shown. Similarity of the spectra confirms that the HT phases of all compounds are isostructural.

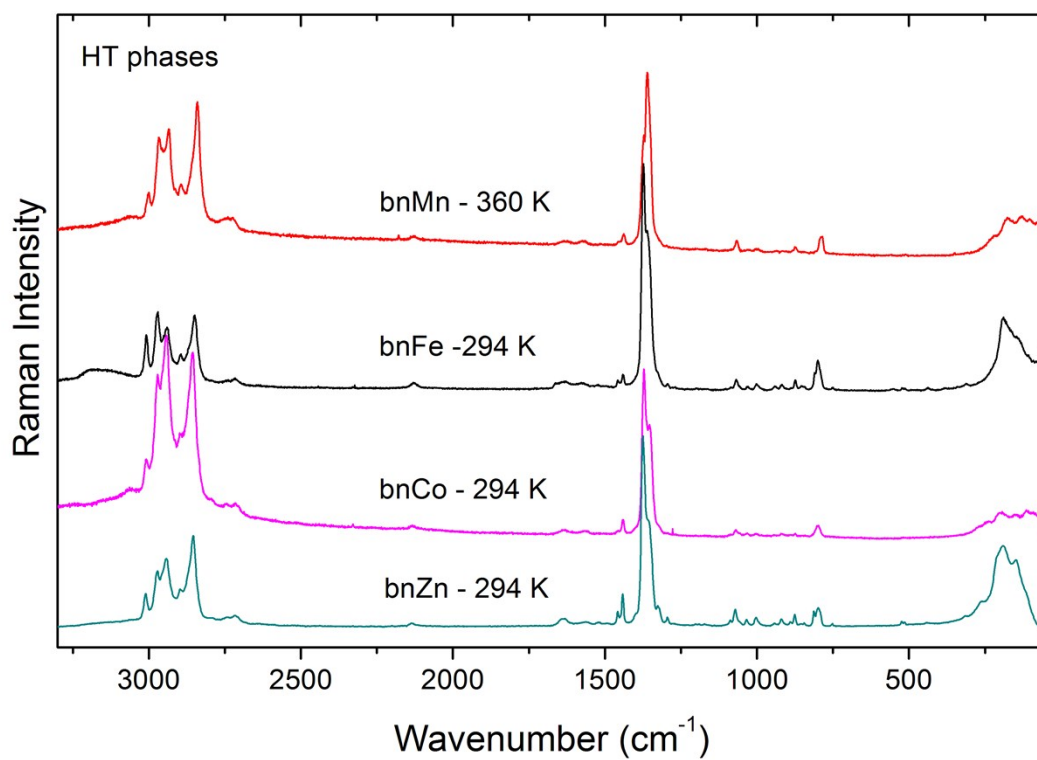

Figure S6. Room-temperature Raman spectra of the studied compounds. Raman spectrum of the HT phase of bnMn is also shown for the comparison sake.

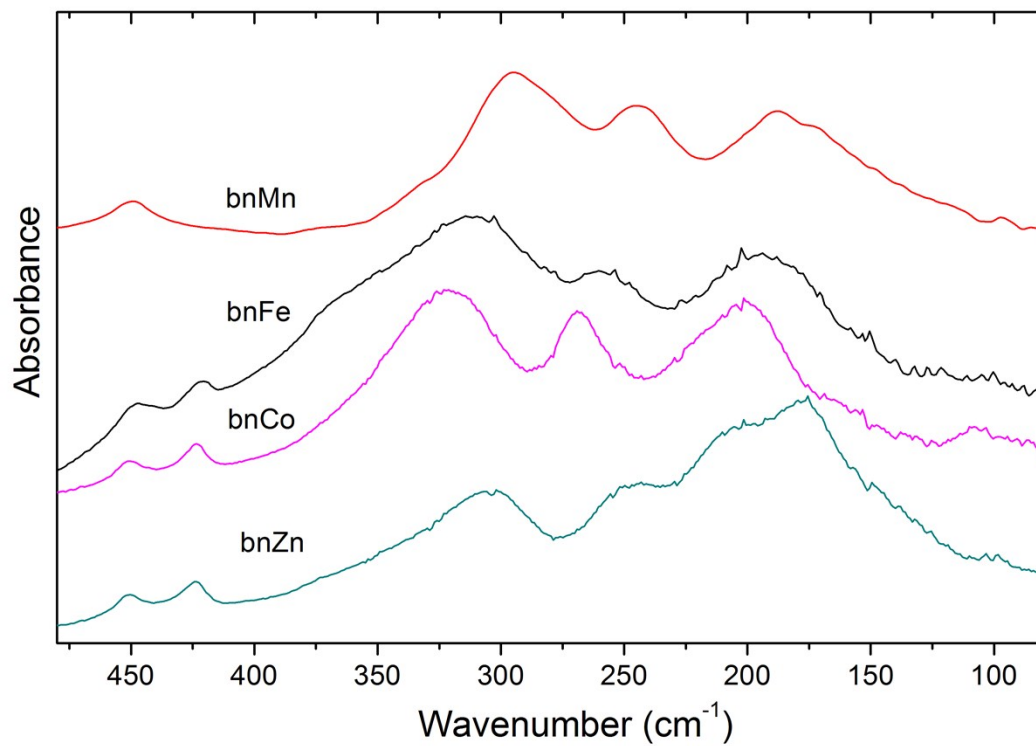

Figure S7. Room-temperature far-IR spectra of the studied compounds.

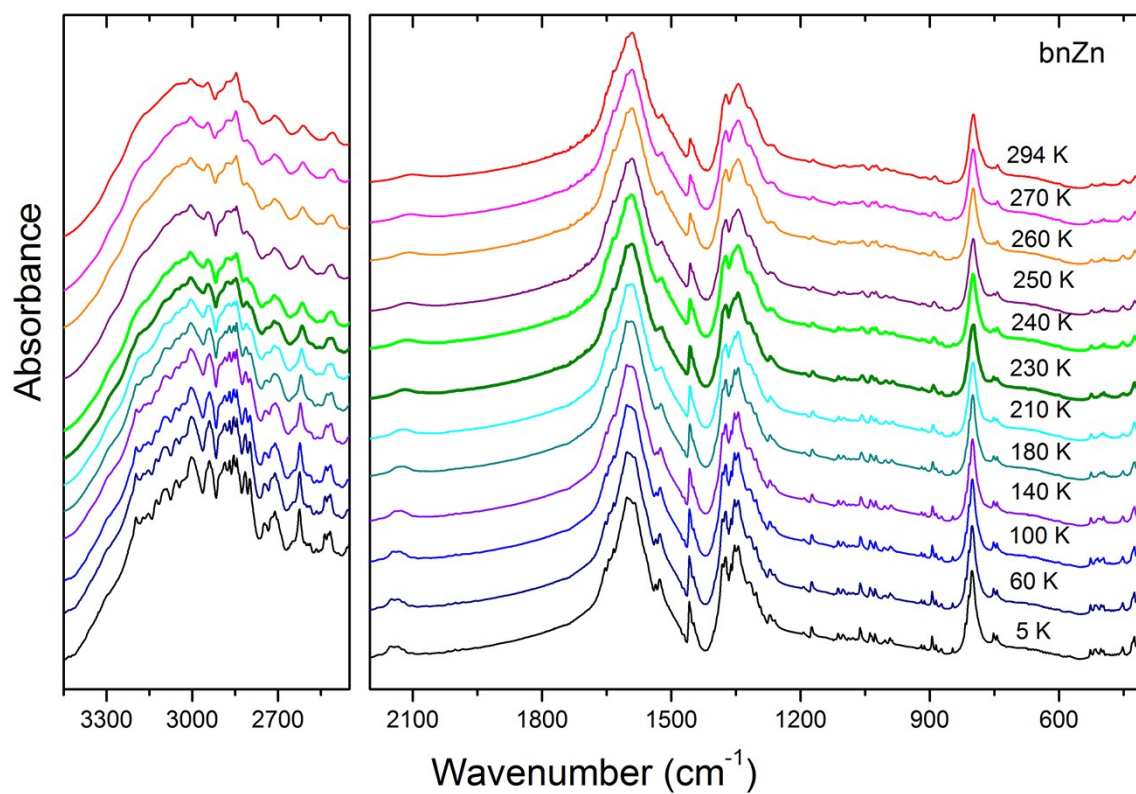

Figure S8. mid-IR spectra of bnZn recorded at various temperatures.



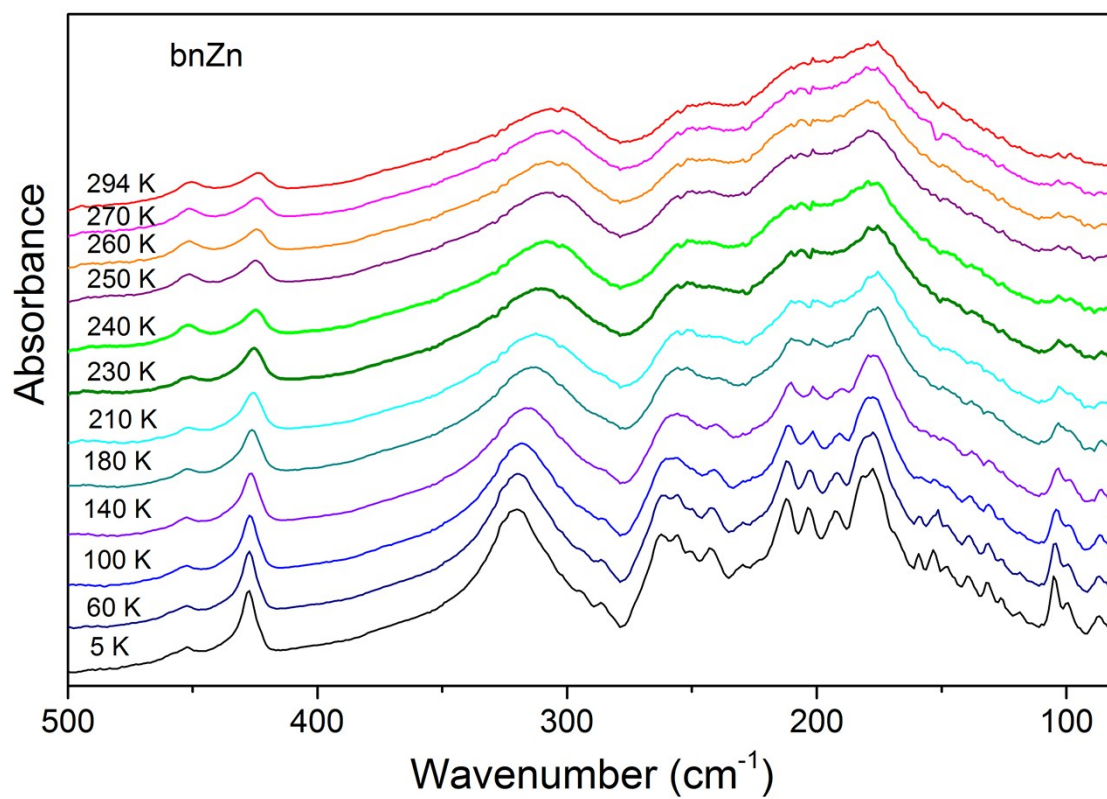

Figure S9. far-IR spectra of bnZn recorded at various temperatures.

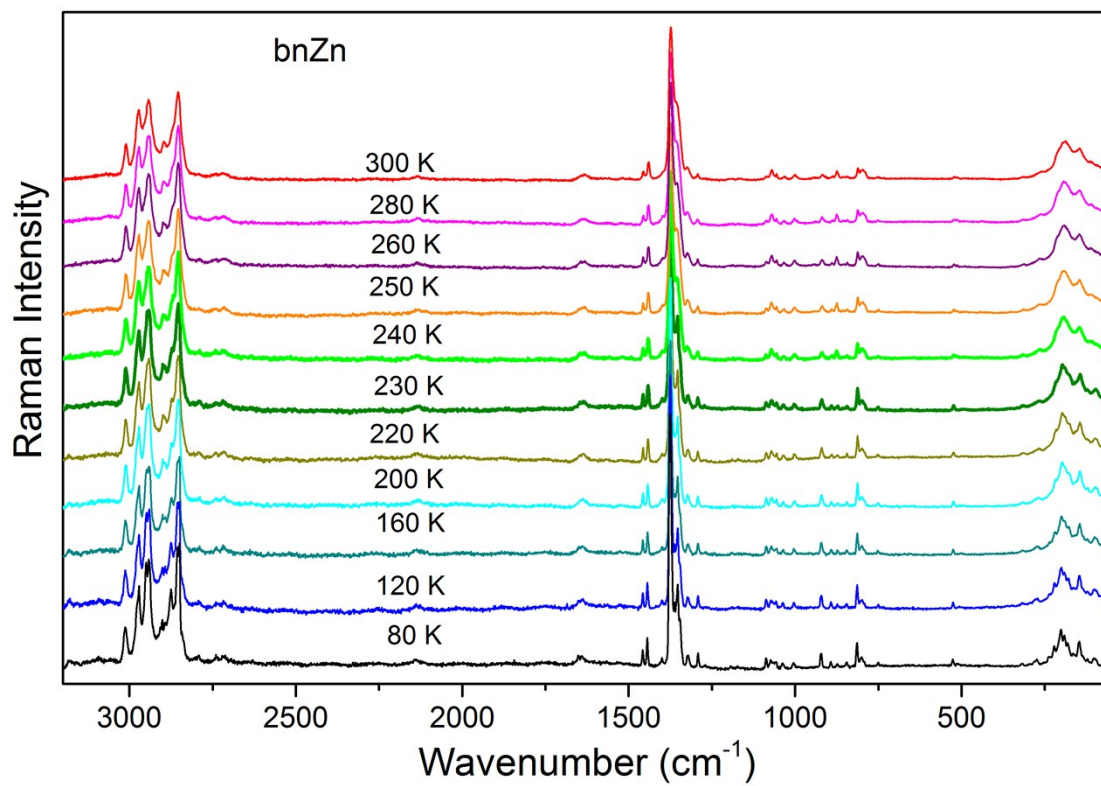

Figure S10. Raman spectra of bnZn recorded at various temperatures.

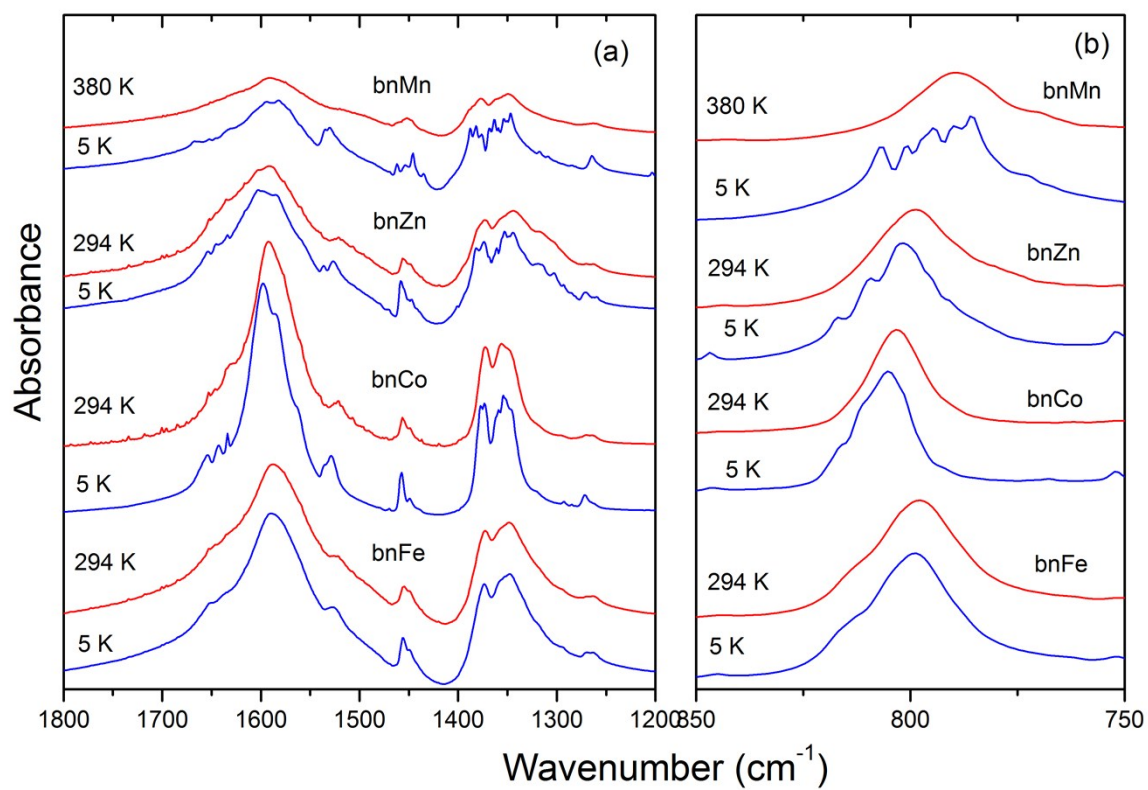

Figure S11. Comparison of the IR spectra for bnZn, bnCo, bnFe and bnMn in the 1200-1800 and 750-850  $\text{cm}^{-1}$  ranges.

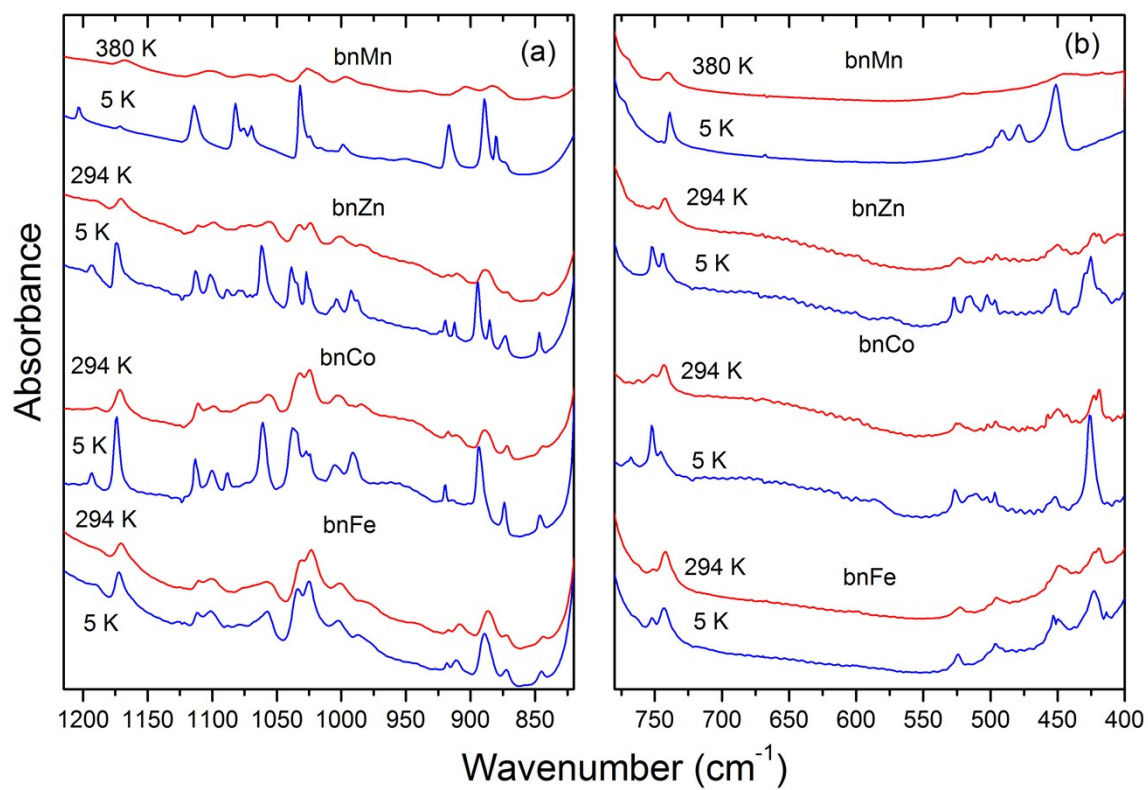

Figure S12. Comparison of the IR spectra for bnZn, bnCo, bnFe and bnMn in the 820-1215 and 400-780 cm<sup>-1</sup> ranges.

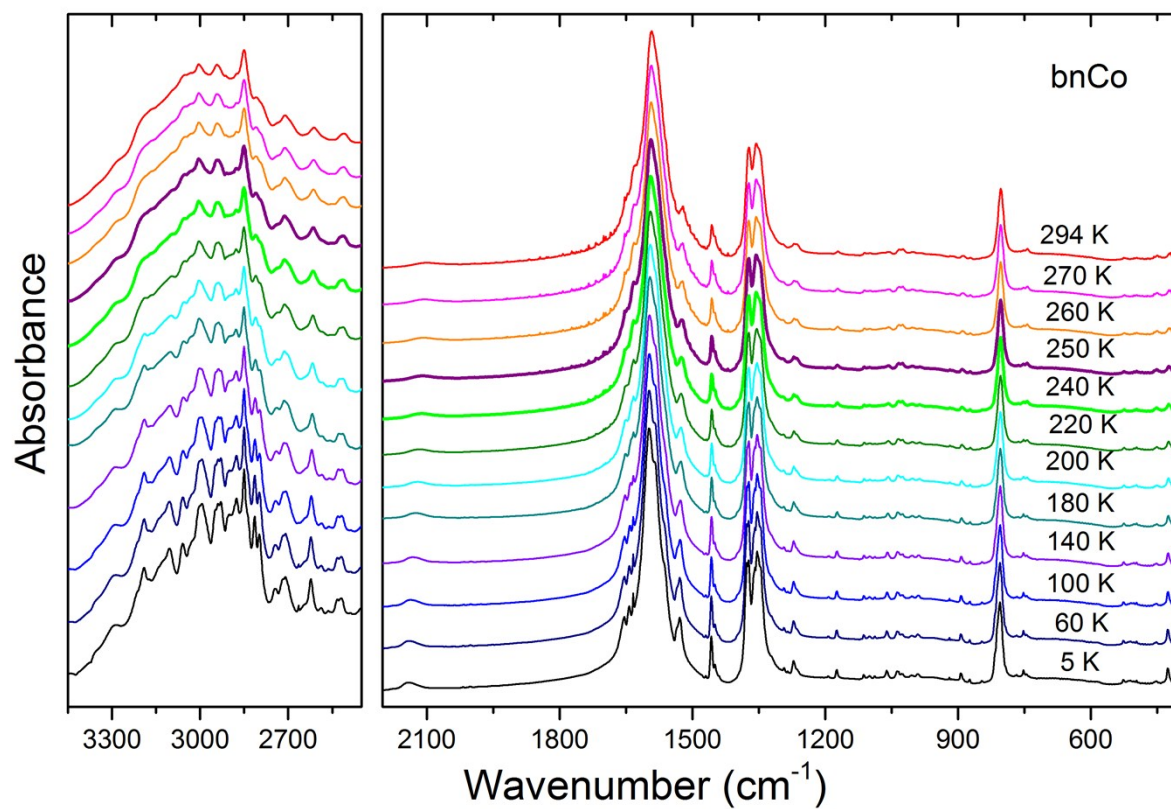

Figure S13. mid-IR spectra of bnCo recorded at various temperatures.



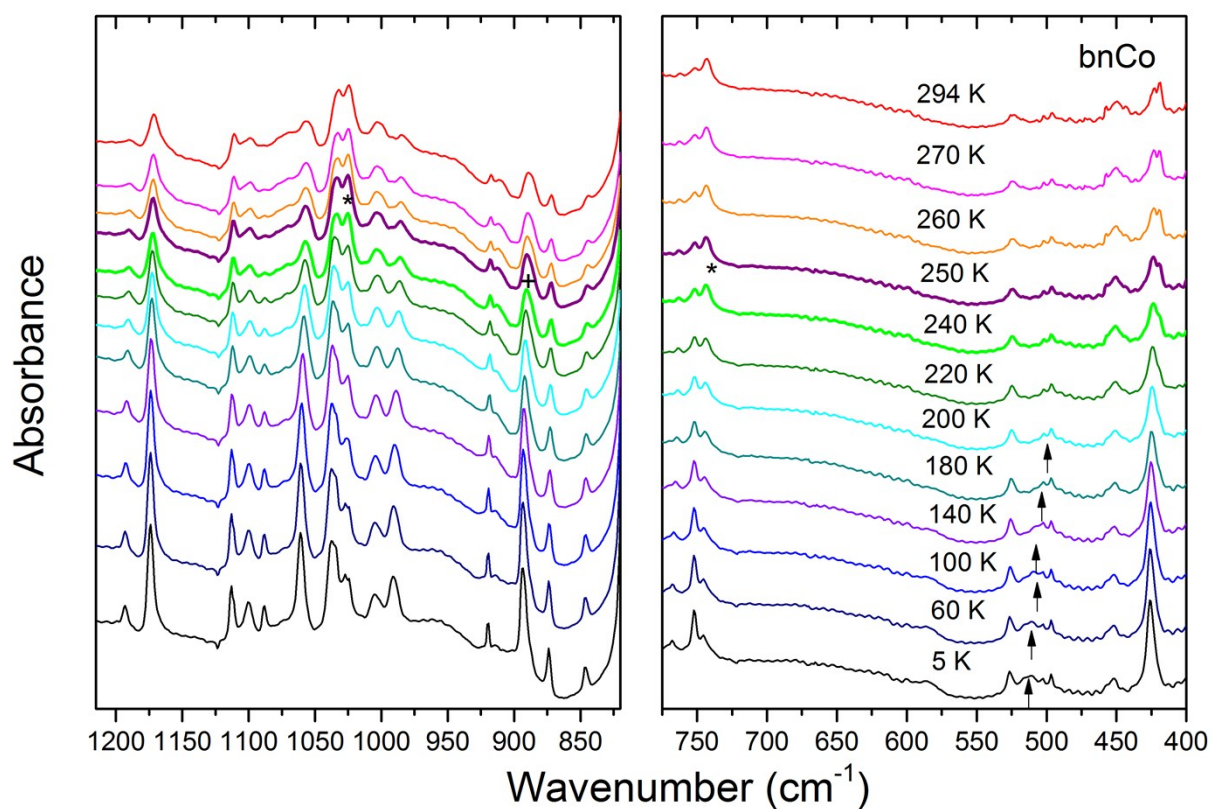

Figure S14. Detail of the IR spectra of bnCo corresponding to the spectral ranges 1215-820 and 775-400  $\text{cm}^{-1}$  at different temperatures in cooling run. Asterisks indicate bands that exhibit sudden intensity change near  $T_C$ . Cross indicates the band that exhibits most pronounced narrowing upon cooling and arrows show position of a very broad band that exhibits large shift towards higher wavenumbers, narrowing and splitting upon cooling below 240 K.

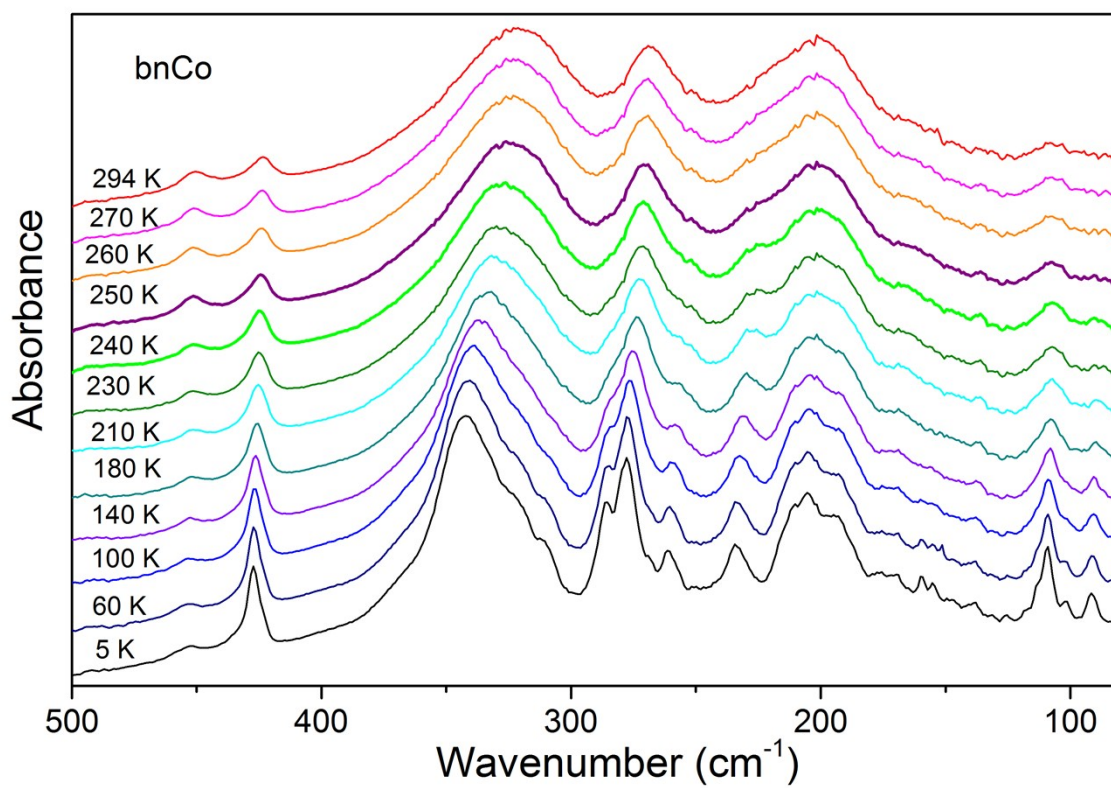

Figure S15. far-IR spectra of bnCo recorded at various temperatures.

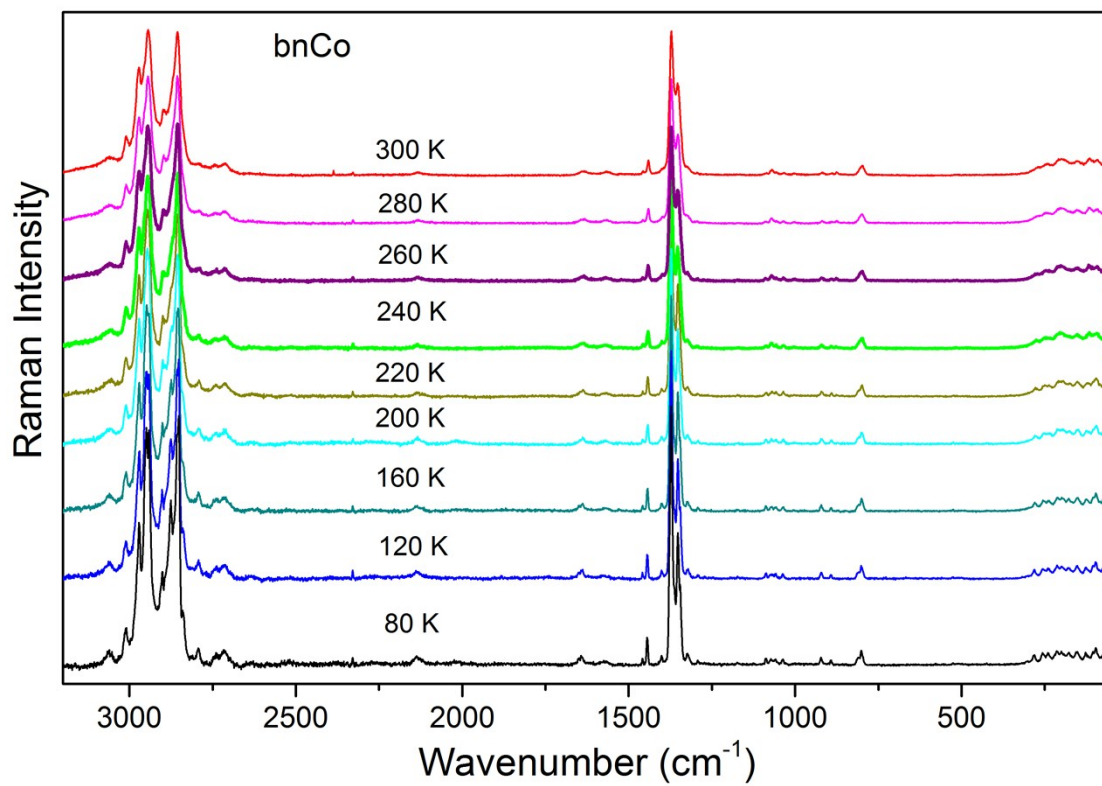

Figure S16. Raman spectra of bnCo recorded at various temperatures.



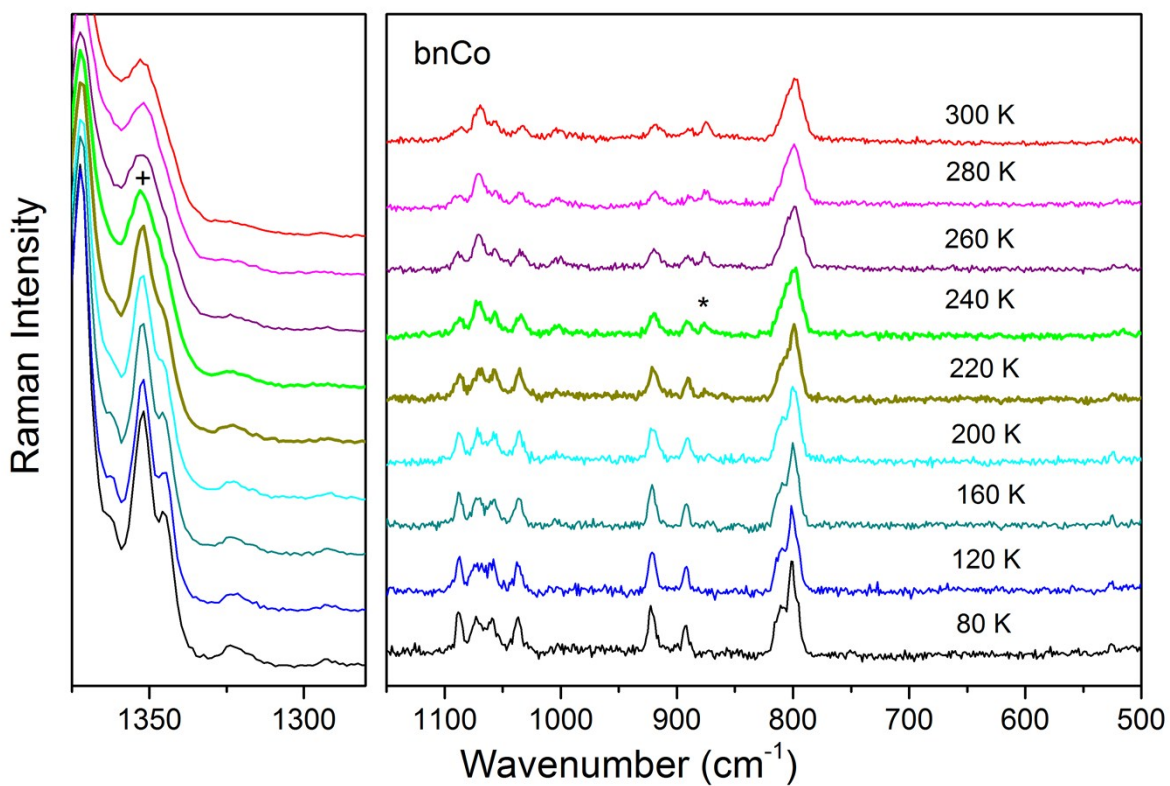

Figure S17. Detail of the Raman spectra of bnCo corresponding to the spectral ranges 1375-1280 and 1150-500  $\text{cm}^{-1}$  at different temperatures in heating run. Asterisk indicates band that exhibits sudden intensity change at  $T_C$ . Cross indicates the band that exhibits pronounced narrowing near  $T_C$ .

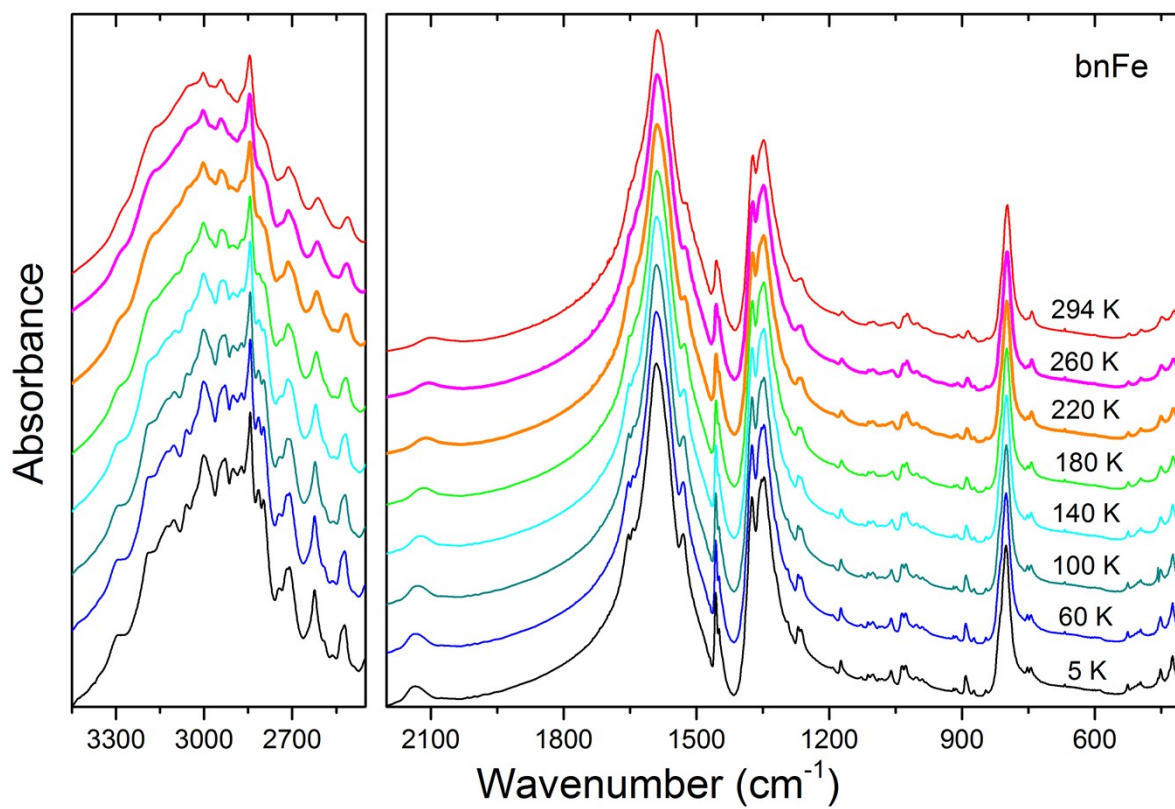

Figure S18. mid-IR spectra of bnFe recorded at various temperatures.

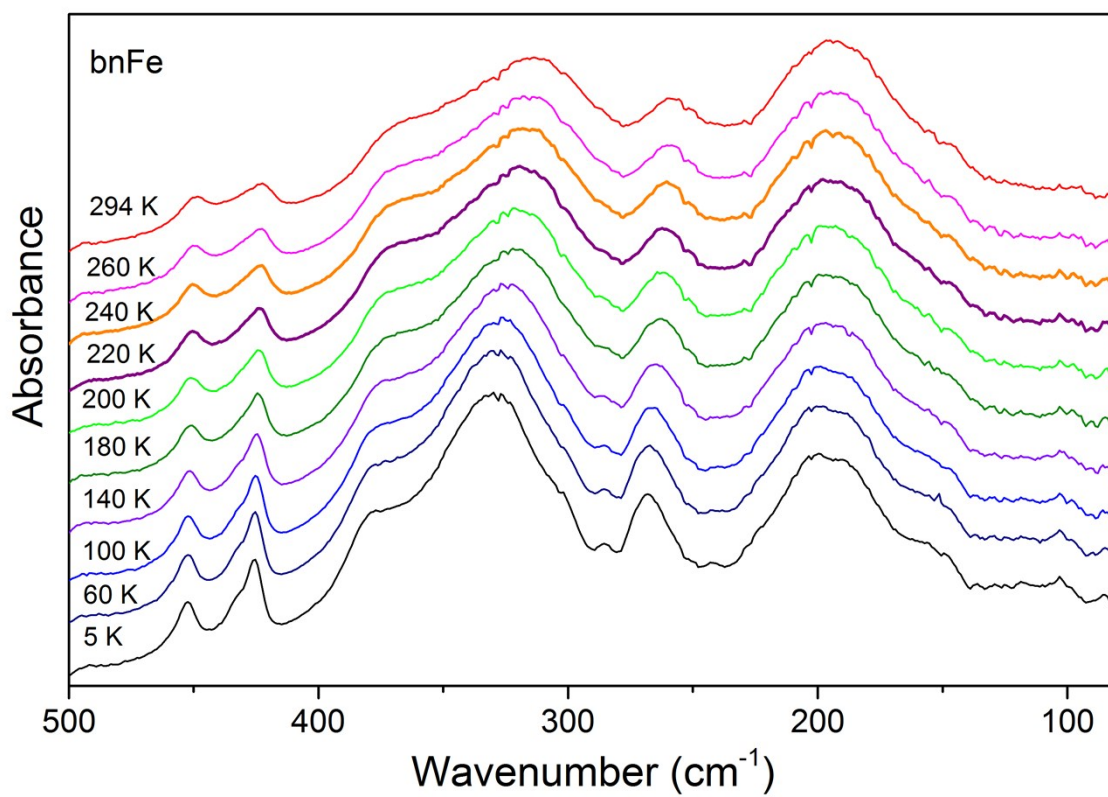

Figure S19. far-IR spectra of bnFe recorded at various temperatures.

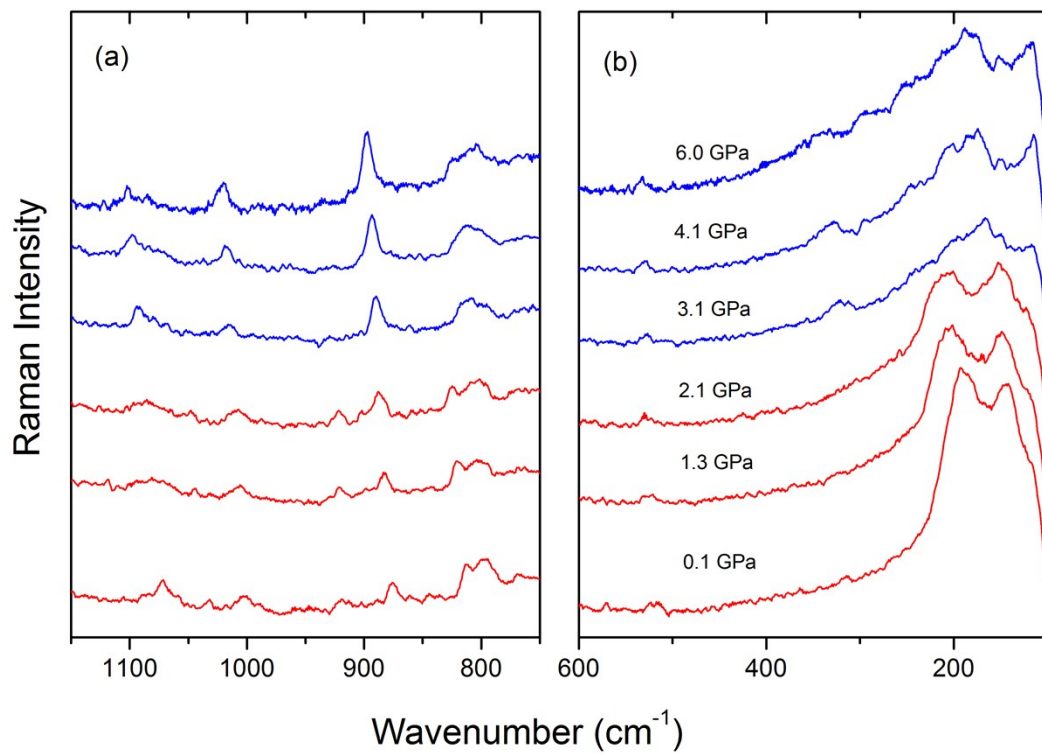

Figure S20. Raman spectra of bnZn recorded during decompression experiment.
